# Supplementary material
Source: Springer Nature journal article supplement (https://www.springermedizin.de/resource/supplementary/12885_2012_3816_MOESM4_ESM.pdf/9465274)

c.654\_655insGTG

c.994 -1G>A

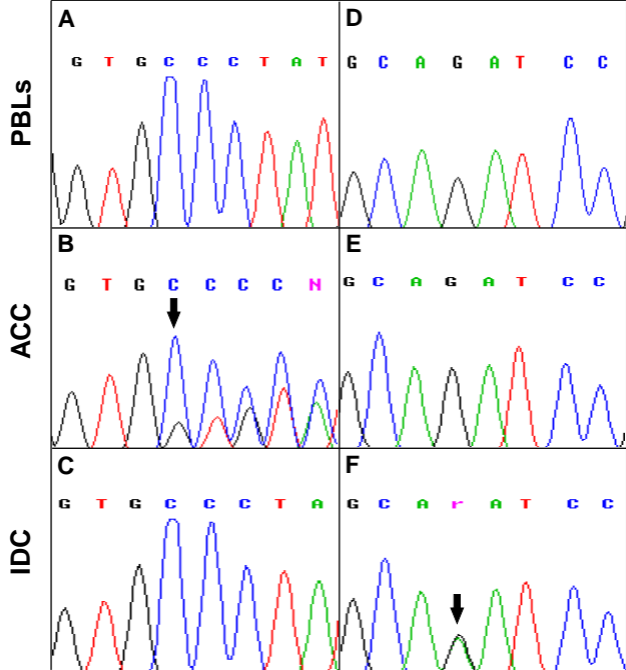

Supplement: MOESM4 [file 9465274]
